# Supplementary material
Source: PubMed Central journal article supplement (PMC6570419)

[RA]  
(nM)

RFP

YFP

0

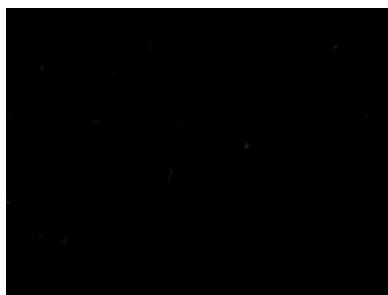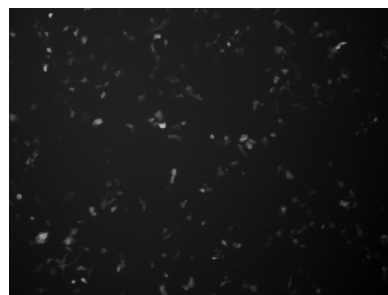

0.1

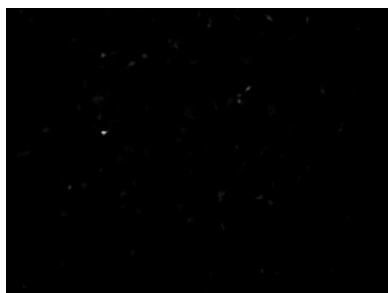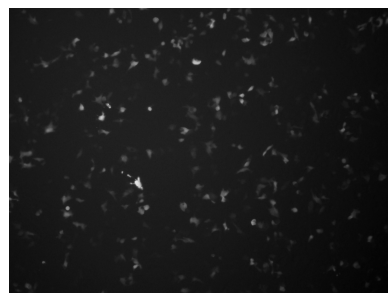

0.5

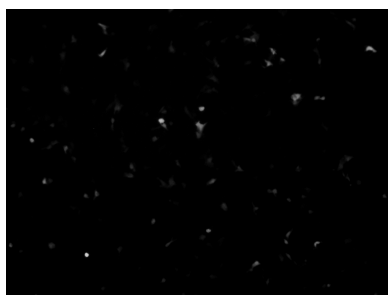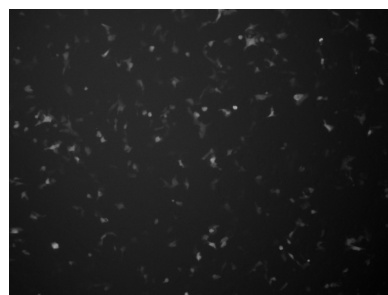

1

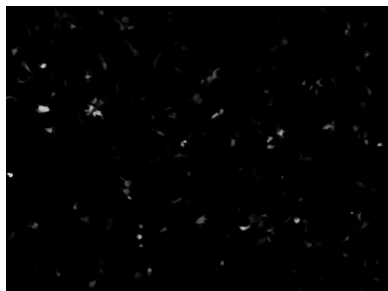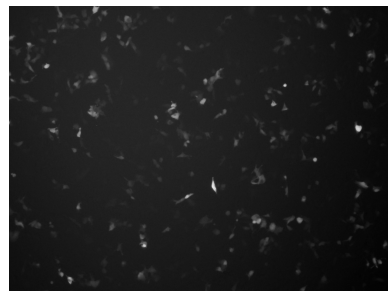

5

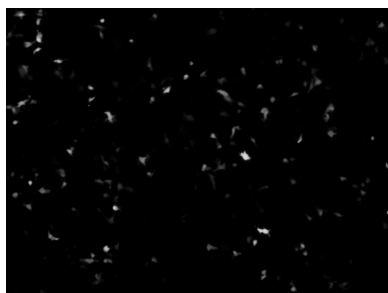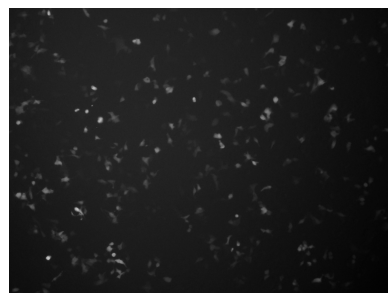

10

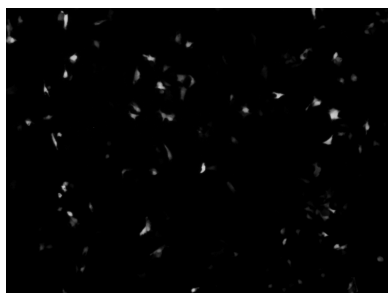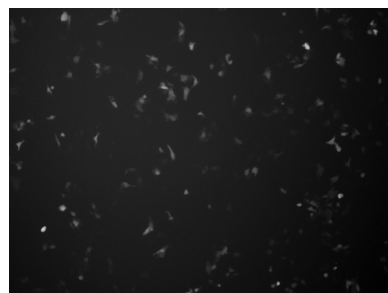

Supplement: NIHMS1528737-supplement-1.pdf [file NIHMS1528737-supplement-1.pdf]

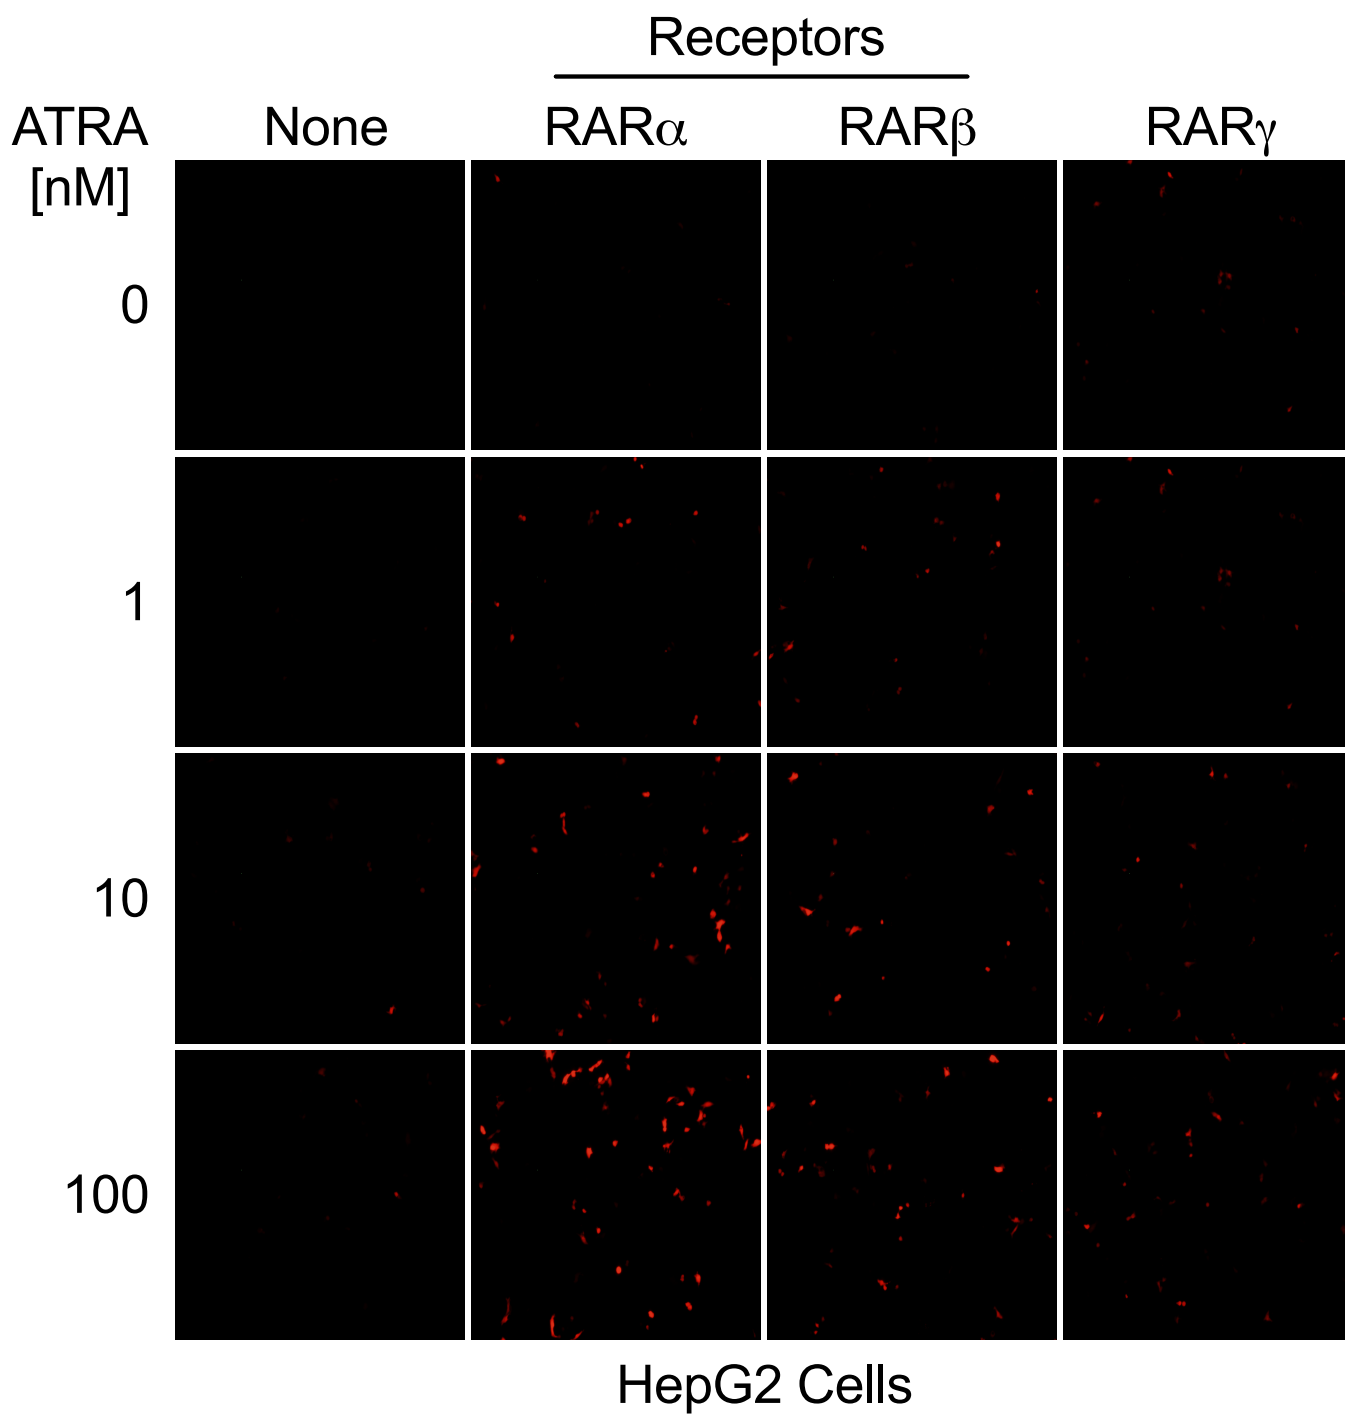

Supplement: NIHMS1528737-supplement-2.pdf [file NIHMS1528737-supplement-2.pdf]

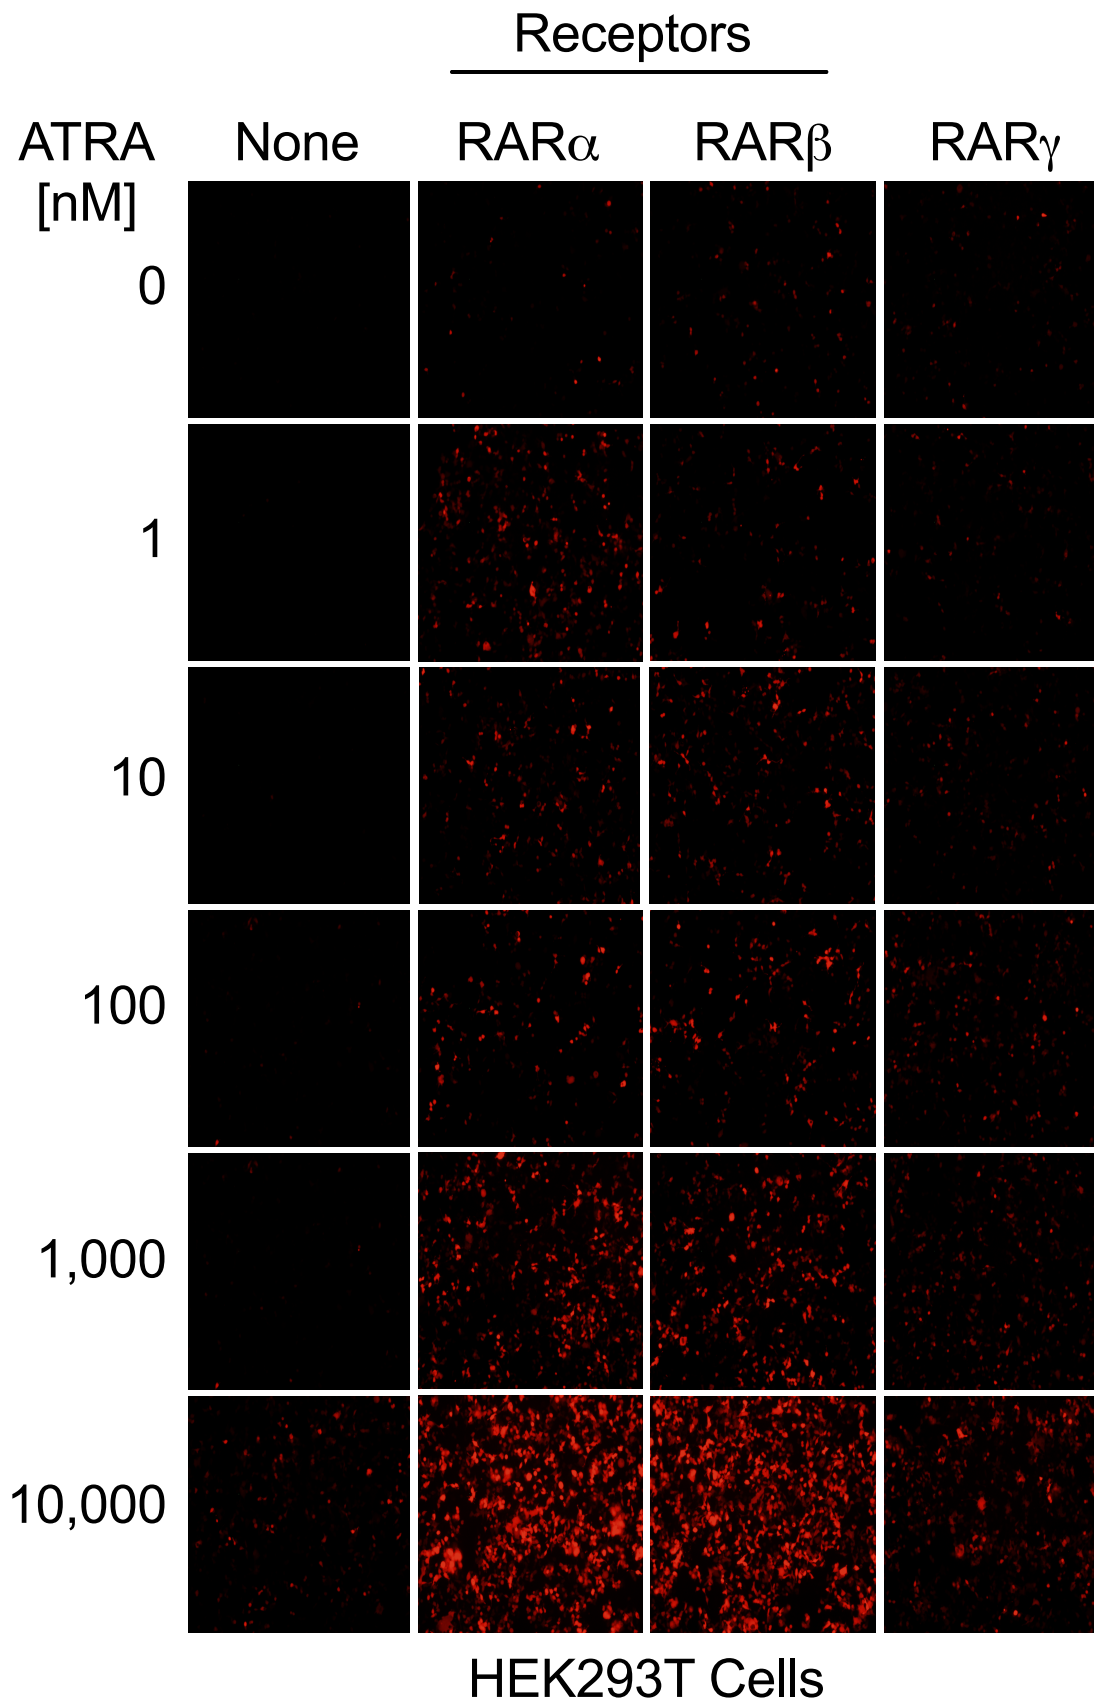

Supplement: NIHMS1528737-supplement-3.pdf [file NIHMS1528737-supplement-3.pdf]

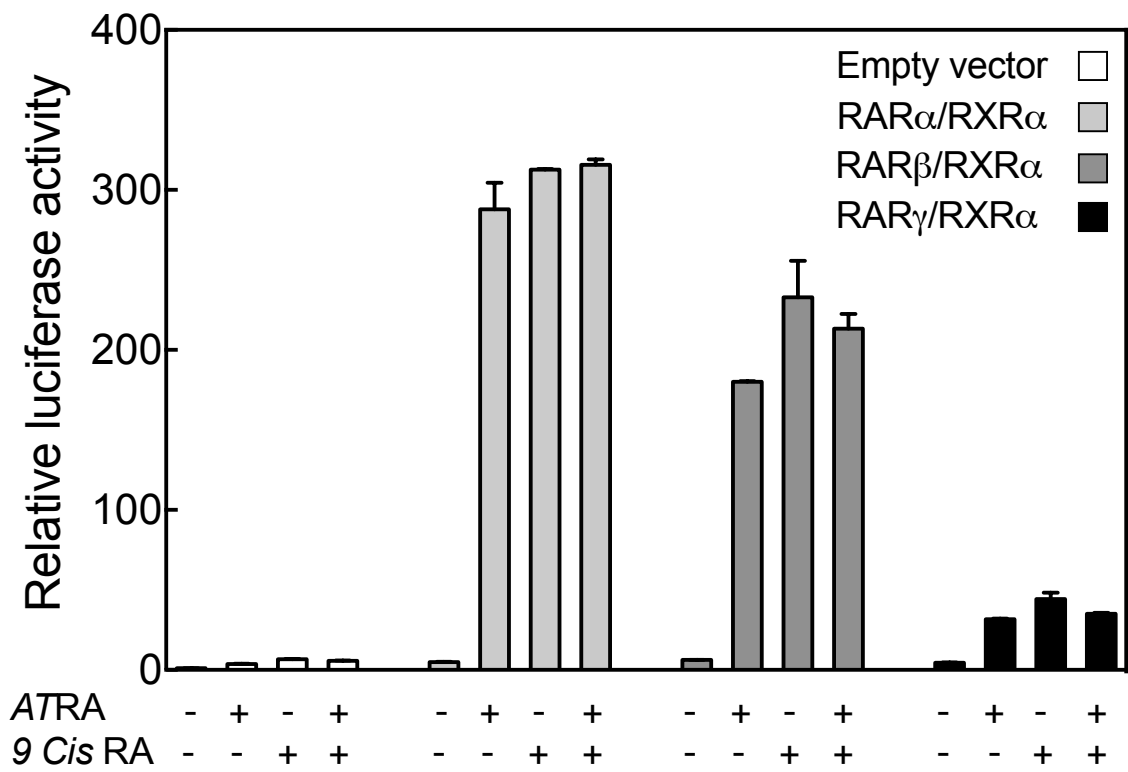

Supplement: NIHMS1528737-supplement-4.pdf [file NIHMS1528737-supplement-4.pdf]

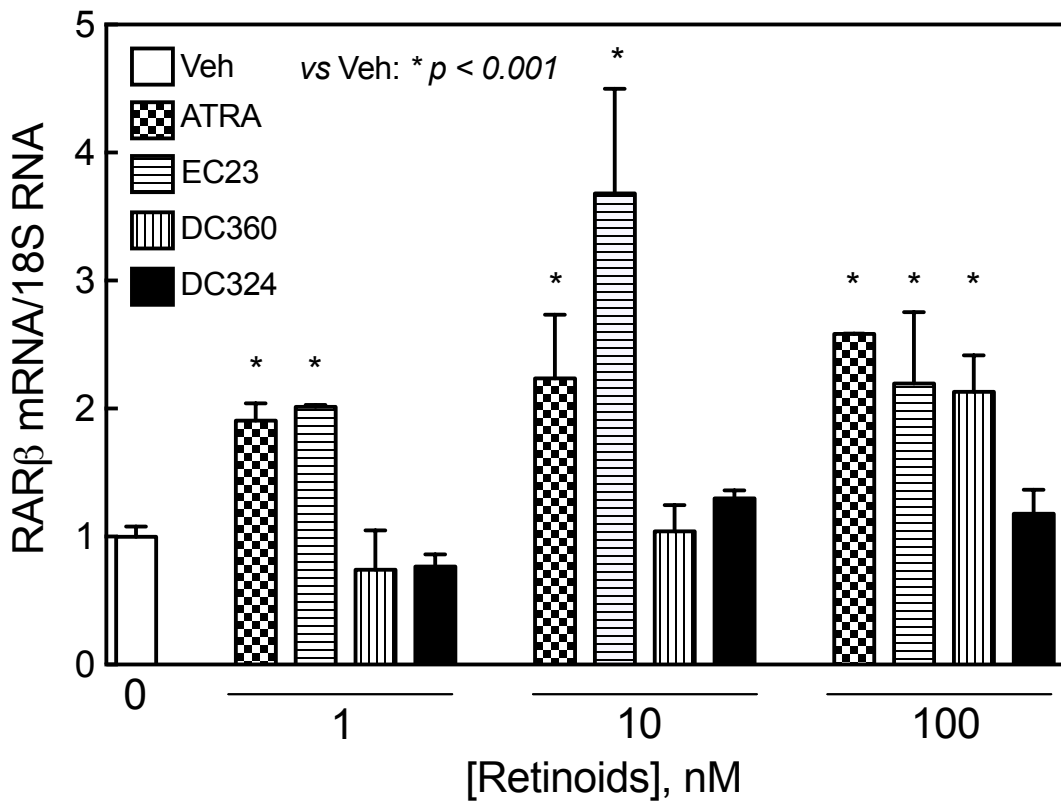

Supplement: NIHMS1528737-supplement-5.pdf [file NIHMS1528737-supplement-5.pdf]
